# Supplementary material for: Hypergravity Load Modulates Acetaminophen Nephrotoxicity via Endoplasmic Reticulum Stress in Association with Hepatic microRNA-122 Expression
Source: MDPI journal article supplement (doi:10.3390/ijms22094901), 2021-05-05
Supplement: s1 [file s1]

## **Supporting Information**

Hypergravity load modulates acetaminophen nephrotoxicity via endoplasmic  
reticulum stress in association with hepatic microRNA-122 expression

## Supporting Results

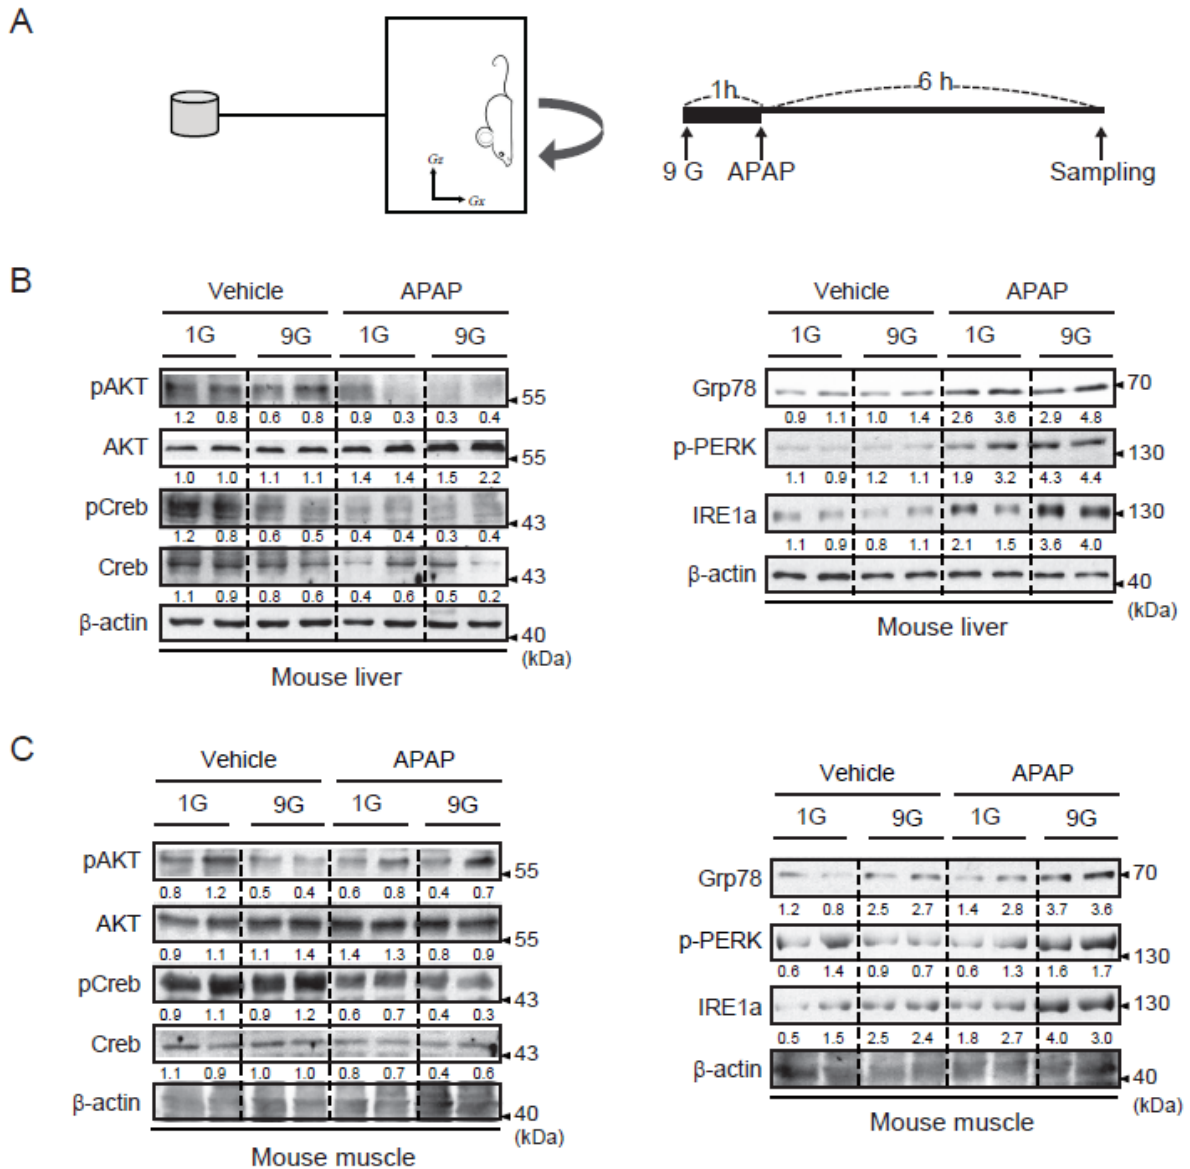

**Supplementary Figure 1. Effects of combined treatment with hypergravity and APAP on cell viability and ER stress markers**

(A) Schematic of hypergravity and APAP treatments. (B, C) Immunoblots for the pAKT, pCreb, and ER stress markers in the liver and tibialis anterior muscle homogenates. Male C57BL/6 mice were exposed to a single +9 Gx load for 1 h, followed by APAP treatment (500 mg/kg BW, i.p.), then

sacrificed 6 h afterward. Immunoblots were assessed from two samples per condition (randomly selected from 6 samples). The values represent fold changes relative to the control ( $\beta$ -actin).

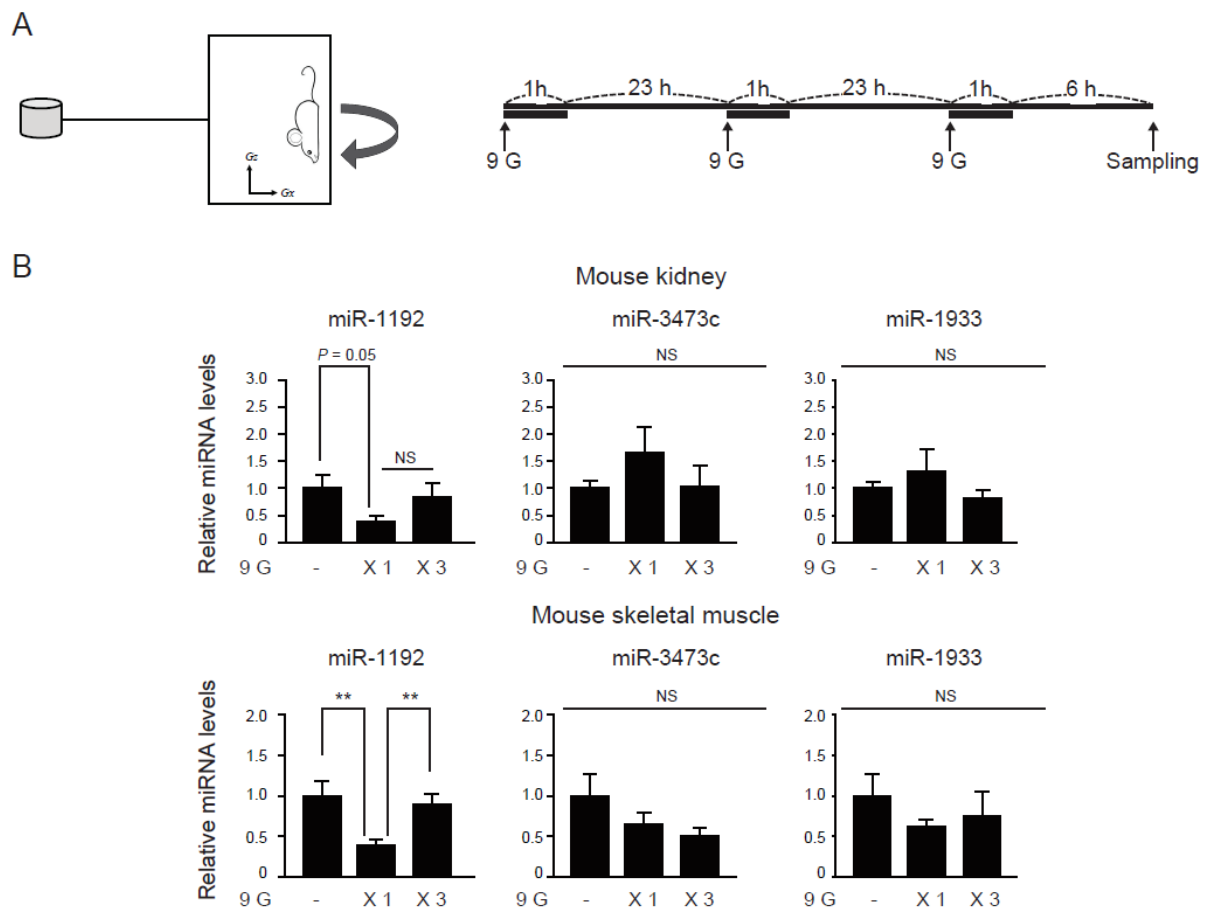

**Supplementary Figure 2. Representative miRNA levels in kidney and muscle of mice exposed to a single or multiple hypergravity loads.**

(A) Schematic of the single or multiple hypergravity load experiments. (B) qRT-PCR assays for miR-1192, miR-3473c, and miR-1933 in the renal cortex and tibialis anterior muscle of mice subjected to a single or multiple +9 Gx hypergravity loads for 1 h per day ( $n=6$ ). The data represent the mean  $\pm$  SEM (statistical differences were determined via the one-way ANOVA; \* $P<0.05$ , \*\* $P<0.01$ , n.s., not significant).

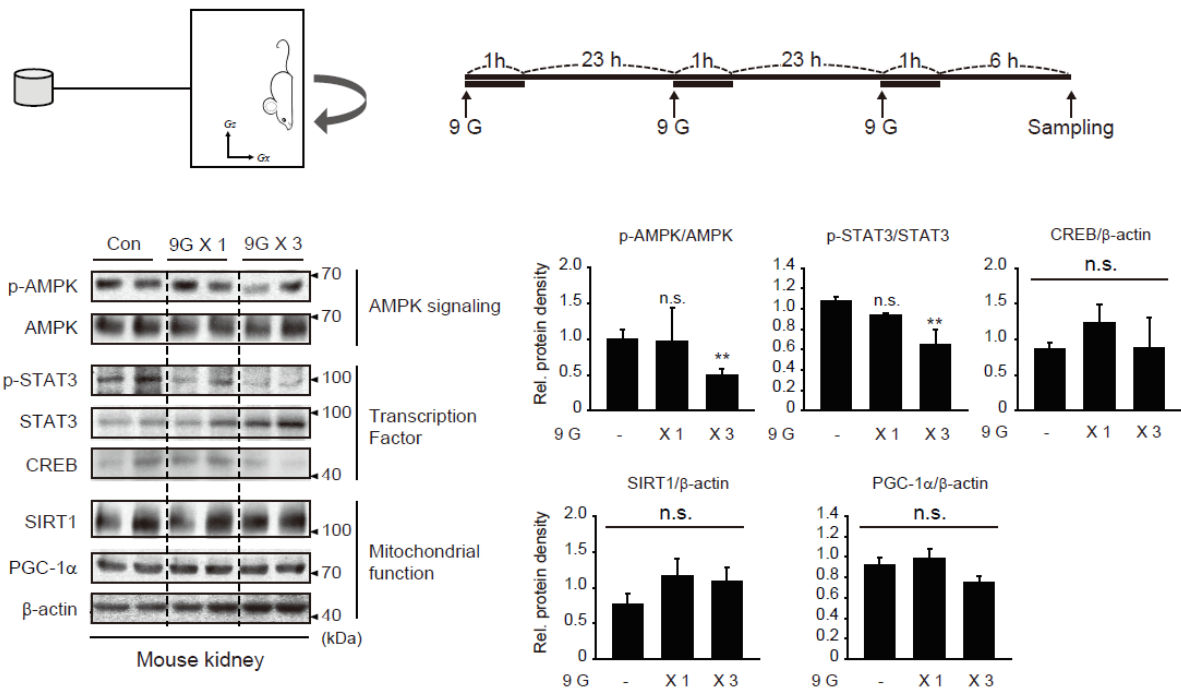

**Supplementary Figure 3. Immunoblottings for p-AMPK, p-STAT3, CREB, Sirt1 and PGC-1α in kidney of mice exposed to a single or multiple hypergravity loads.**

The samples were obtained using the same mice as in Supplementary Figure 2. Immunoblots were assessed from two samples per condition (randomly selected from 6 samples). The values represent fold changes relative to the control (β-actin).

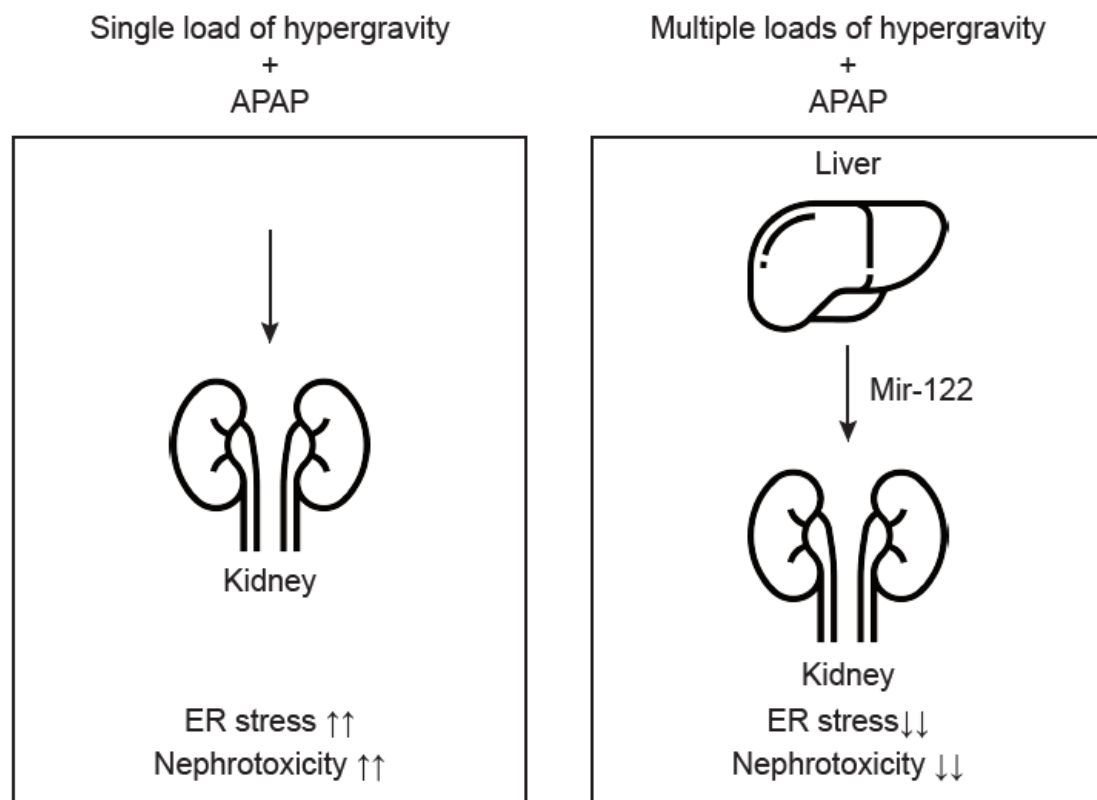

**Supplementary Figure 4. Schematic showing the mechanistic basis of kidney protection by multiple hypergravity loads against APAP treatment.**

**Supporting Table 1. Information on antibodies or other reagents used**

| Item           | Supplier       | Catalog no.        |
|----------------|----------------|--------------------|
| pCREB          | Cell Signaling | 9198               |
| CREB           | Cusabio        | CSB-PA005947HA01HU |
| pAKT           | Cell Signaling | 9275               |
| AKT            | Cell Signaling | 4685S              |
| Grp78          | Abcam          | ab21685            |
| p-PERK         | Santa Cruz     | sc-32577           |
| IRE1a          | Santa Cruz     | sc-20790           |
| p-AMPK         | Cell Signaling | 2535S              |
| AMPK           | Cell Signaling | 2532               |
| $\beta$ -actin | Sigma          | A5441              |

**Supporting Table 2. The sequences of primers**

|             | Gene symbols | Forward primers          | Reverse primers                                              |
|-------------|--------------|--------------------------|--------------------------------------------------------------|
| Mouse mRNAs | <i>Kim-1</i> | TTCTCCCAGGCACTGTGGAT     | CAGGAATCTCCACTCGACAA                                         |
|             | <i>Bax</i>   | AGACAGGGGCCTTTTGCTAC     | AATTCGCCGGAGACACTCG                                          |
|             | <i>Bcl2</i>  | GAGAGCGTCAACAGGGAGATG    | CCAGCCTCCGTTATCCTGGA                                         |
|             | <i>Actin</i> | CTGAGAGGGAAATCGTGC       | TGTTGGCATAGAGGTCTT                                           |
| microRNAs   | miR-122      | TGGAGTGTGACAATGGTGTTTG   | Universal reverse primer<br>(Qiagen proprietary information) |
|             | miR-1192     | AAACAAACAAACAGACCAAATT   |                                                              |
|             | miR-3473c    | TCTCTCCAGCCCCATAATAAG    |                                                              |
|             | miR-1933     | AGTCATGGTGTTCGGTCTTAGTTT |                                                              |
